# Supplementary material for: Structure-Based Statistical Mechanical Model Accounts for the Causality and Energetics of Allosteric Communication
Source: PLOS journal article supplement (doi:10.1371/journal.pcbi.1004678), 2016-03-03
Supplement: S3 (10.1371/journal.pcbi.1004678.s003) [file journal.pcbi.1004678.s003]

### S3 Figure

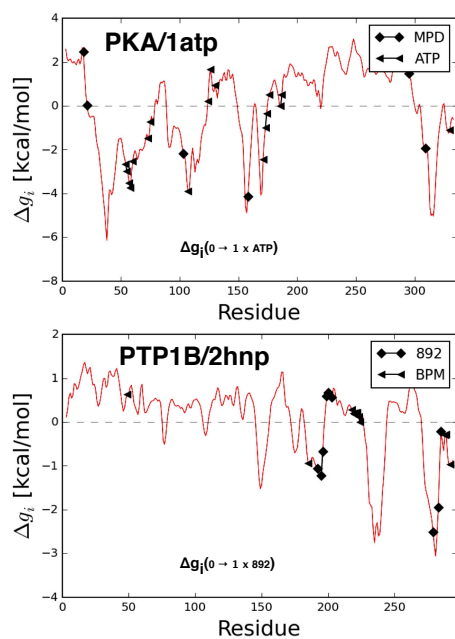

The allosteric free energy profiles  $\Delta g_i$  for the proteins DAK (apo form PDB ID: 1atp) and PTP1B (apo form PDB ID: 2hnp) as a result of the allosteric binding of at the ATP and 892 sites respectively.
